# Supplementary material for: Uptake of HPV testing and extended cervical cancer screening intervals following cytology alone and Pap/HPV cotesting in women aged 30–65 years
Source: Springer Nature journal article supplement (doi:10.1007/s10552-017-0976-x), 2017-11-09
Supplement: MOESM1 [file 15208548]

**Supplemental Figure 1**: Flowchart outlining exclusion criteria and sample size for final study population

We received all Pap smear and HPV test results in PDS processed between January 1, 2001 and May 28, 2013, which totaled 306,722 records. We then applied several restrictions to the data as described above, resulting in a final sample size of 55,575 records from 27,035 women.

*For the interval analysis, we restricted this sample to screening before May 1, 2010, resulting in 31,701 records from 18,048 women.
